# Supplementary material for: Structure of the peroxisomal Pex1/Pex6 ATPase complex bound to a substrate
Source: PubMed Central journal article supplement (PMC10518020; doi:10.1038/s41467-023-41640-9), 2023-09-23
Supplement: 41467_2023_41640_MOESM1_ESM.pdf [file 41467_2023_41640_MOESM1_ESM.pdf]

## Supplementary Information

# Structure of the peroxisomal Pex1/Pex6 ATPase complex bound to a substrate

Maximilian Rüttermann<sup>1,2</sup>, Michelle Koci<sup>3</sup>, Pascal Lill<sup>1,2,3</sup>, Ermis Dionysios Geladas<sup>1,2</sup>, Farnusch Kaschani<sup>4</sup>, Björn Udo Klink<sup>1,2</sup>, Ralf Erdmann<sup>5</sup>, Christos Gatsogiannis<sup>1,2,3,\*</sup>

<sup>1</sup>Institute for Medical Physics and Biophysics, University Münster, 48149 Münster, Germany.

<sup>2</sup>Center for Soft Nanoscience (SoN), University Münster, 48149 Münster, Germany.

<sup>3</sup>Department of Structural Biochemistry, Max Planck Institute of Molecular Physiology, 44227, Dortmund, Germany.

<sup>4</sup>Analytics Core Facility Essen, Center of Medical Biotechnology (ZMB), Faculty of Biology, University of Duisburg-Essen, Universitätsstr. 2, 45141 Essen, Germany

<sup>5</sup>Institute for Biochemistry and Pathobiochemistry, Department of Systems Biochemistry, Ruhr-University Bochum, 44780 Bochum, Germany

\*To whom correspondence should be addressed.

E-mail: [christos.gatsogiannis@uni-muenster.de](mailto:christos.gatsogiannis@uni-muenster.de)

**Supplementary Table 1:** Phenix density modification command prompts.

|                                       | Class 3<br>Single-'seam' conformation                                                                                                                                                                                                                                                                                                                       | Class 4<br>Twin-'seam' conformation                                                                                                                                                                                                                                                                                                                     |
|---------------------------------------|-------------------------------------------------------------------------------------------------------------------------------------------------------------------------------------------------------------------------------------------------------------------------------------------------------------------------------------------------------------|---------------------------------------------------------------------------------------------------------------------------------------------------------------------------------------------------------------------------------------------------------------------------------------------------------------------------------------------------------|
| Local anisotropic half-map sharpening | phenix.local_aniso_sharpen<br>run_half1_class001_unfil.mrc<br>run_half2_class001_unfil.mrc<br>resolution=4.14<br>local_sharpen=True<br>sharpened_map_file_1=.\Output_command\half1_local_sharp.ccp4<br>sharpened_map_file_2=.\Output_command\half2_local_sharp.ccp4<br>box_size_grid_units=384<br>sharpened_map_file=.\Output_command\full_local_sharp.ccp4 | phenix.local_aniso_sharpen<br>run_half1_class001_unfil.mrc<br>run_half2_class001_unfil.mrc<br>resolution=4.7 local_sharpen=True<br>sharpened_map_file_1=.\Output_command\half1_local_sharp.ccp4<br>sharpened_map_file_2=.\Output_command\half2_local_sharp.ccp4<br>box_size_grid_units=384<br>sharpened_map_file=.\Output_command\full_local_sharp.ccp4 |
| Density modification                  | phenix.resolve_cryo_em<br>half1_local_sharp_aniso.ccp4<br>half2_local_sharp_aniso.ccp4<br>seq_file=.\Input\Pex1_Pex6_yeast.fasta resolution=4.14<br>blur_by_resolution=True<br>blur_by_resolution_factor=20<br>box_cushion=15 b_iso=90<br>dm_resolution=3.6                                                                                                 | phenix.resolve_cryo_em<br>half1_local_sharp.ccp4<br>half2_local_sharp.ccp4<br>seq_file=.\Input\Pex1_Pex6_yeast.fasta<br>resolution=4.14 blur_by_resolution=True<br>blur_by_resolution_factor=20<br>box_cushion=15 b_iso=90<br>dm_resolution=3.8                                                                                                         |

**Supplementary Table 2: Cryo-EM data collection and refinement statistics**

| <b>Data collection</b>                                      |                                                        |                                        |
|-------------------------------------------------------------|--------------------------------------------------------|----------------------------------------|
| Microscope                                                  | Titan Krios with Cs-corrector and XFEG electron source |                                        |
| Voltage (kV)                                                | 300                                                    |                                        |
| Nominal magnification                                       | 105,000 x                                              |                                        |
| Electron Dose (e <sup>-</sup> / Å <sup>2</sup> )            | 60                                                     |                                        |
| Number of frames                                            | 60                                                     |                                        |
| Detector                                                    | Gatan K3                                               |                                        |
| Pixel size (Å)                                              | 0.34 (super resolution mode)                           |                                        |
| Defocus range (µm)                                          | -0.6 to -2.4                                           |                                        |
| Micrographs                                                 | 16,763                                                 |                                        |
| <b>Reconstruction</b>                                       |                                                        |                                        |
| Software                                                    | SPHIRE 1.4, RELION 3.1.4, Phenix 1.20, Cryosparc 4     |                                        |
| Total extracted particles                                   | 1,259,079                                              |                                        |
| Structure<br>Pex1/Pex6E832Q                                 | Class 3<br>Single-'seam' conformation                  | Class 4<br>Twin-'seam' conformation    |
| Particles                                                   | 164,610                                                | 128,983                                |
| Symmetry                                                    | C1                                                     | C1                                     |
| Final average resolution, gold standard FSC=0.143           | 4.1 Å                                                  | 4.7 Å                                  |
| Final average resolution after density modification FSC=0.5 | 3.9 Å                                                  | 4.3 Å                                  |
| <b>Model refinement</b>                                     |                                                        |                                        |
| Peptide chains                                              | 7                                                      | 7                                      |
| Residues                                                    | 5564                                                   | 5564                                   |
| Ligands                                                     | ATP: 10, ADP: 2, Mg <sup>2+</sup> : 10                 | ATP: 10, ADP: 2, Mg <sup>2+</sup> : 10 |
| RMSD Bond length (Å)                                        | 0.003                                                  | 0.004                                  |
| RMSD Bond angles (°)                                        | 0.751                                                  | 0.881                                  |
| Ramachandran outliers (%)                                   | 0.04                                                   | 0.00                                   |
| Ramachandran allowed (%)                                    | 7.26                                                   | 9.8                                    |
| Ramachandran favored (%)                                    | 92.68                                                  | 90.2                                   |
| Rotamer outliers (%)                                        | 0.06                                                   | 0.00                                   |
| MolProbity score                                            | 1.81                                                   | 1.89                                   |
| Clash score                                                 | 6.27                                                   | 6.28                                   |
| EMRinger score                                              | 1.53                                                   | 0.99                                   |
| B-factors mean (Protein)                                    | 132.26                                                 | 131.73                                 |
| B-factors mean (Ligand)                                     | 92.38                                                  | 89.13                                  |

## Supplementary Figures

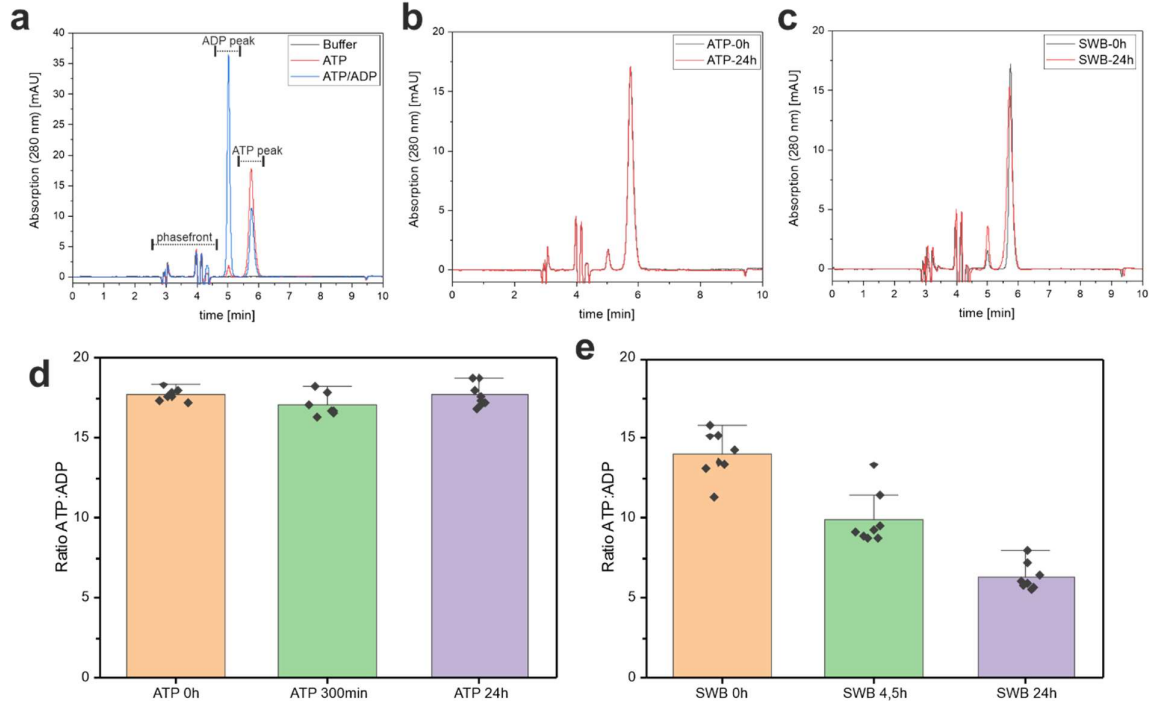

**Supplementary Figure 1: Time-dependent decrease in ATP/ADP ratio analyzed by HPLC.** Representative chromatograms are shown (a-c). Control experiments were performed with ATP alone. The ATP/ADP ratios in the presence of Pex1/Pex6<sub>WB</sub> were obtained by quantification of the results from HPLC analyses at different timepoints upon addition of ATP to the protein sample (d-e). Source data are provided as a Source Data file.

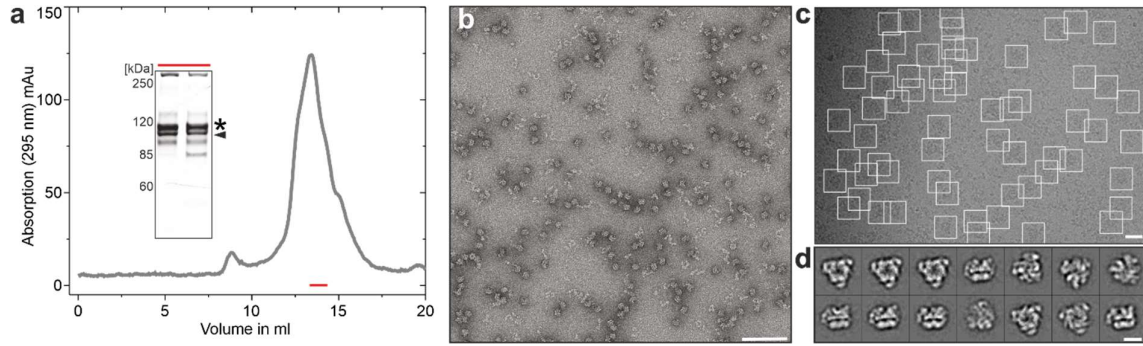

**Supplementary Figure 2: Expression and purification of recombinant Pex1/Pex6\_WB.** **a)** Size exclusion chromatogram (SEC), showing one major peak corresponding to a complex of Pex1 (star) and Pex6\_WB (arrow), as confirmed by SDS-PAGE (inset). The red bar indicates fractions, which were pooled for subsequent cryo-EM studies. **b)** Representative micrograph of negatively stained Pex1/Pex6\_WB complex after SEC. Scalebar 100 nm. **c)** Representative cryo-EM micrograph of Pex1/Pex6\_WB low-pass filtered to 5 Å. Scale bar 20 nm. Boxes represent particles identified by crYOLO. **d)** Representative reference-free 2D class averages of Pex1/Pex6\_Pex6\_WB complex. Scale bar 10nm.

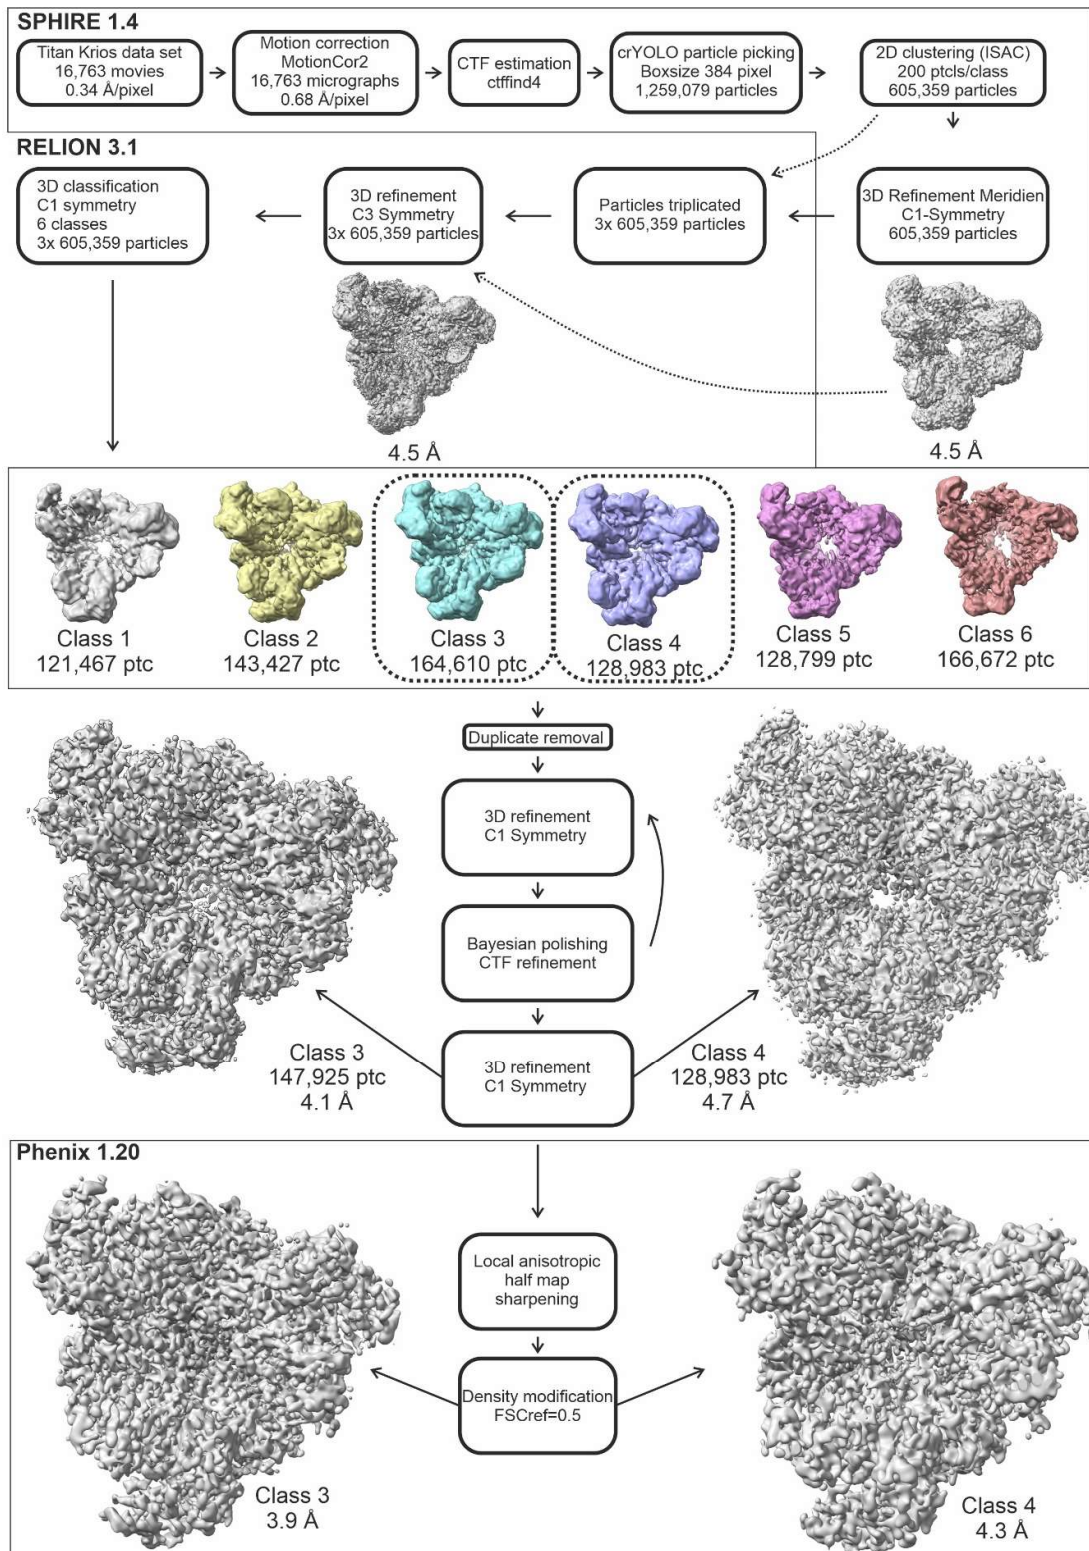

**Supplementary Figure 3: Single-particle cryo-EM processing workflow.** The final maps of class 3 and class 4 from RELION and Phenix have been used for model building. Electron density maps are shown at (class3, single-seam state) 4.42 sigma (2.26 sigma for density-modified) and at (class4, twin-seam state) 4.72 sigma (2.11 sigma for density-modified), respectively.



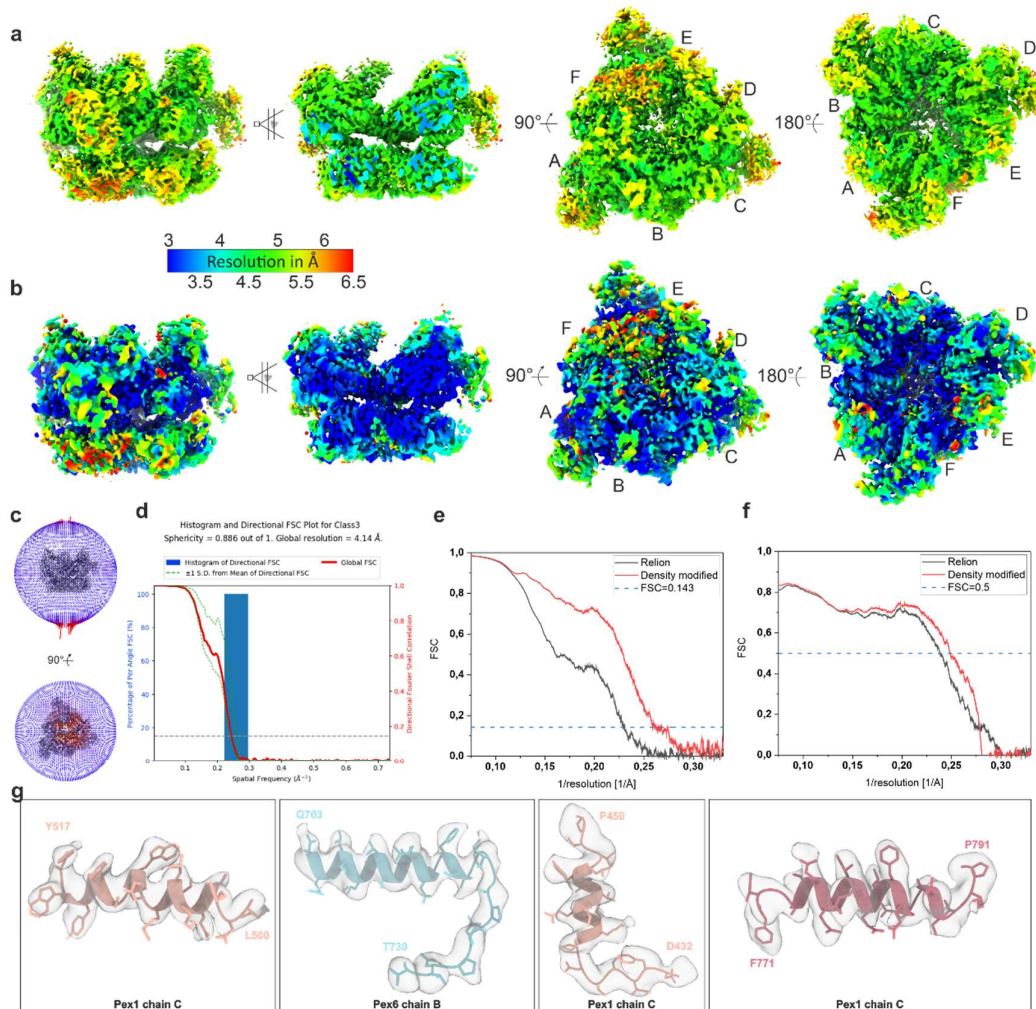

**Supplementary Figure 4: Cryo-EM structure of the single 'seam' state (class 3).** **a-b**) Different surface views and cross-section of the cryo-EM density map colored according to the local resolution, upon post-processing in RELION at 4.42 sigma (a) and after local anisotropic half map sharpening and density modification using Phenix at 2.26 sigma (b). **c**) Angular distribution for the final round of the refinement. **d**) 3D FSC curve. **e**) Half-map FSC curves and **f**) model-map FSC curves before (gray) and after (red) density modification using phenix. **g**) Representative areas of the density map superimposed with the molecular model. Density-modified map is shown at 2.26 sigma.

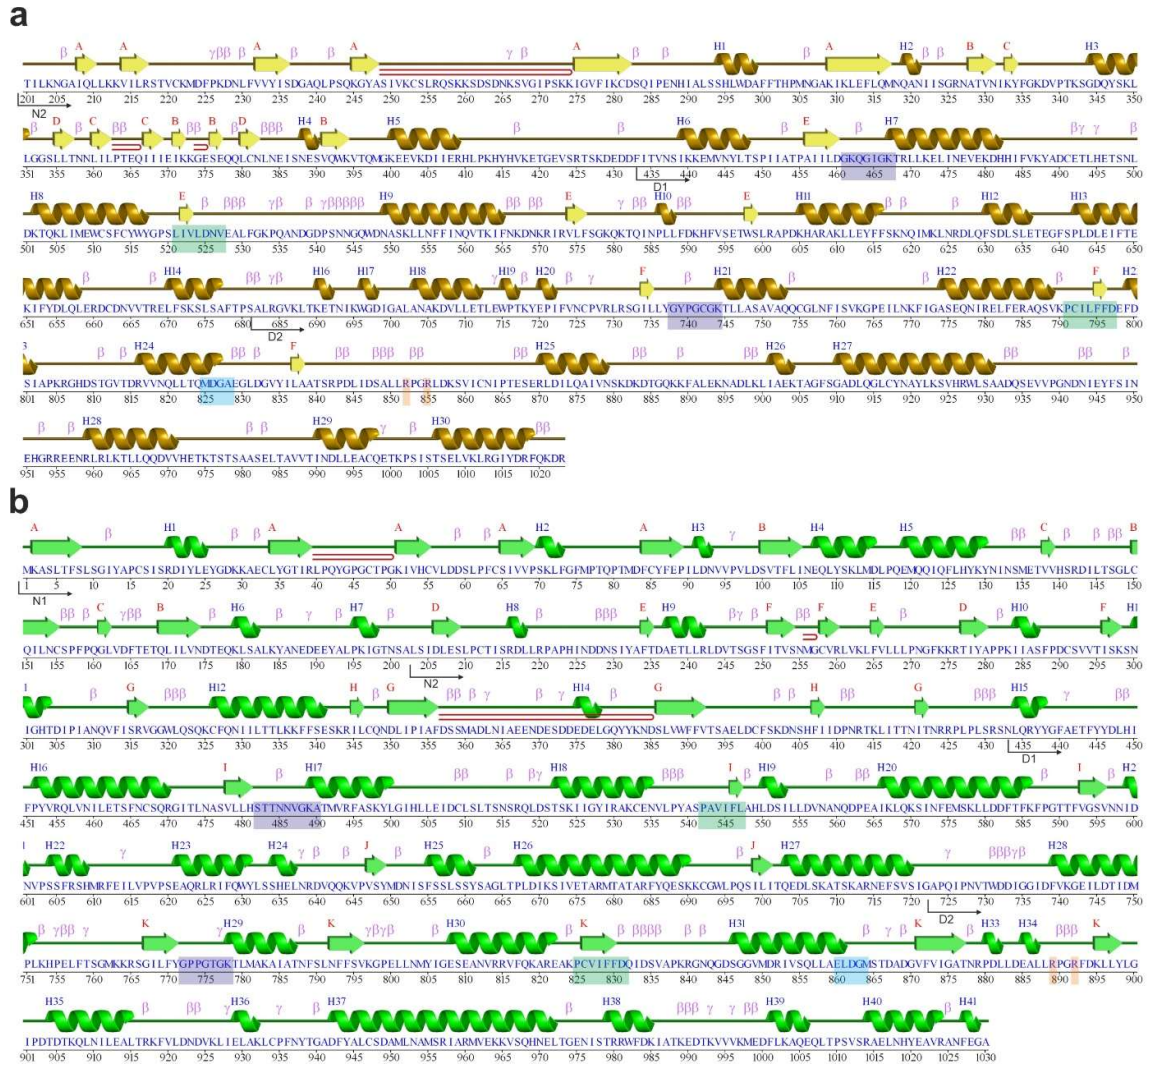

**Supplementary Figure 5. Secondary structure of Pex1(chain c) (a) and Pex6(chain d) (b) computed with PDBsum (<http://www.ebi.ac.uk/pdbsum/>)<sup>1</sup>.  $\alpha$ -helices are labeled H1, H2, ..., H41 and  $\beta$ -strands by their sheets as A, B, ..., K. Structural motifs  $\beta$ -turns,  $\gamma$ -turns, and  $\beta$ -hairpins are marked as  $\beta$ ,  $\gamma$ , and  $\triangleright$ , respectively. Important conserved motifs are indicated: Walker A (dark purple), Walker B (green), ISS (cyan), pore loops (red loop) and arginine fingers (orange).**



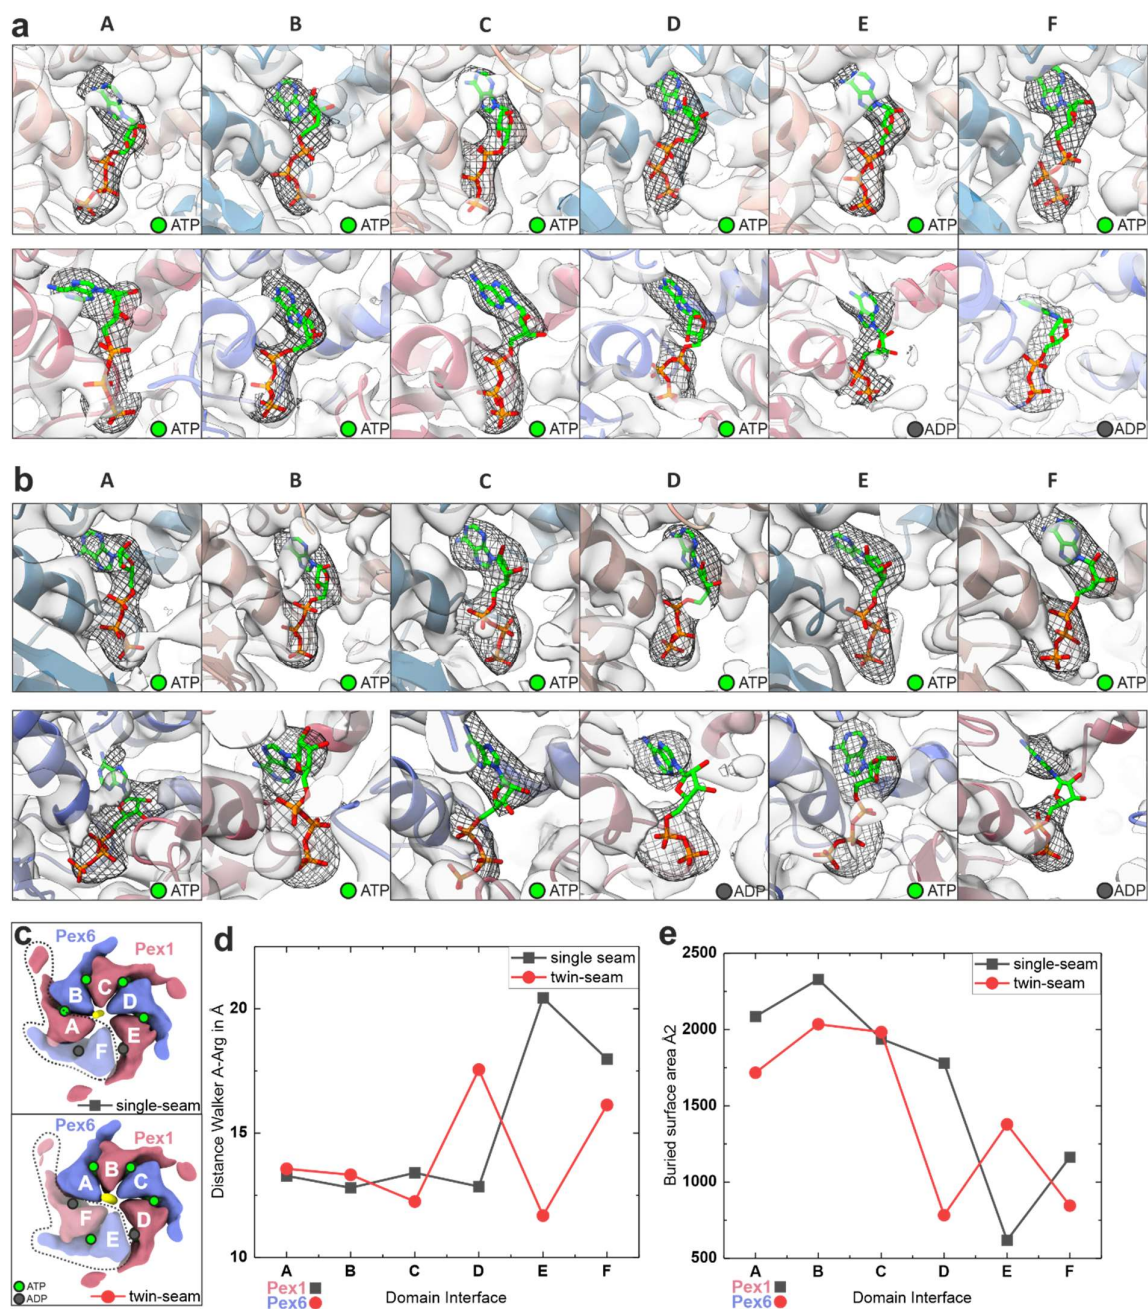

**Supplementary Figure 6: Analysis of the nucleotide binding pockets a-b)** Nucleotide models and corresponding cryo-EM density of the D1 (upper panels) and D2 (lower panels) ring of the single-seam (**a**) and twin-seam (**b**) state. Density-modified map is shown at 2.26 sigma (class3) and 2.11 sigma (class4). A-F indicate Pex subunits. **c)** Position of nucleotide binding pockets and D2-interfaces respective to the disengaged seam (F) domain for the single-seam (upper-inset) and twin-seam state (lower-inset). Letters (from A-F) define the individual subunit position within the stair-case. Domain A occupies the highest position of the spiral. **d)** Measurements of the opening of the nucleotide binding pocket for the single- (gray) and twin-seam (red) state. Shown are the distances between the C $\alpha$  of Walker A Thr and the C $\alpha$  of the Arg-finger of the neighboring subunit (Pex1-Pex6 interface: Pex1(T745)-Pex6 (R892); Pex6-Pex1 interface: Pex6(T779)-Pex1(R855)). **e)** Contact area between the large and small AAA+ domains of neighboring D2 domains. The buried surface area was measured between the D2 domains of Pex1 (residues 681-1020) and Pex6 (residues 723-1030).

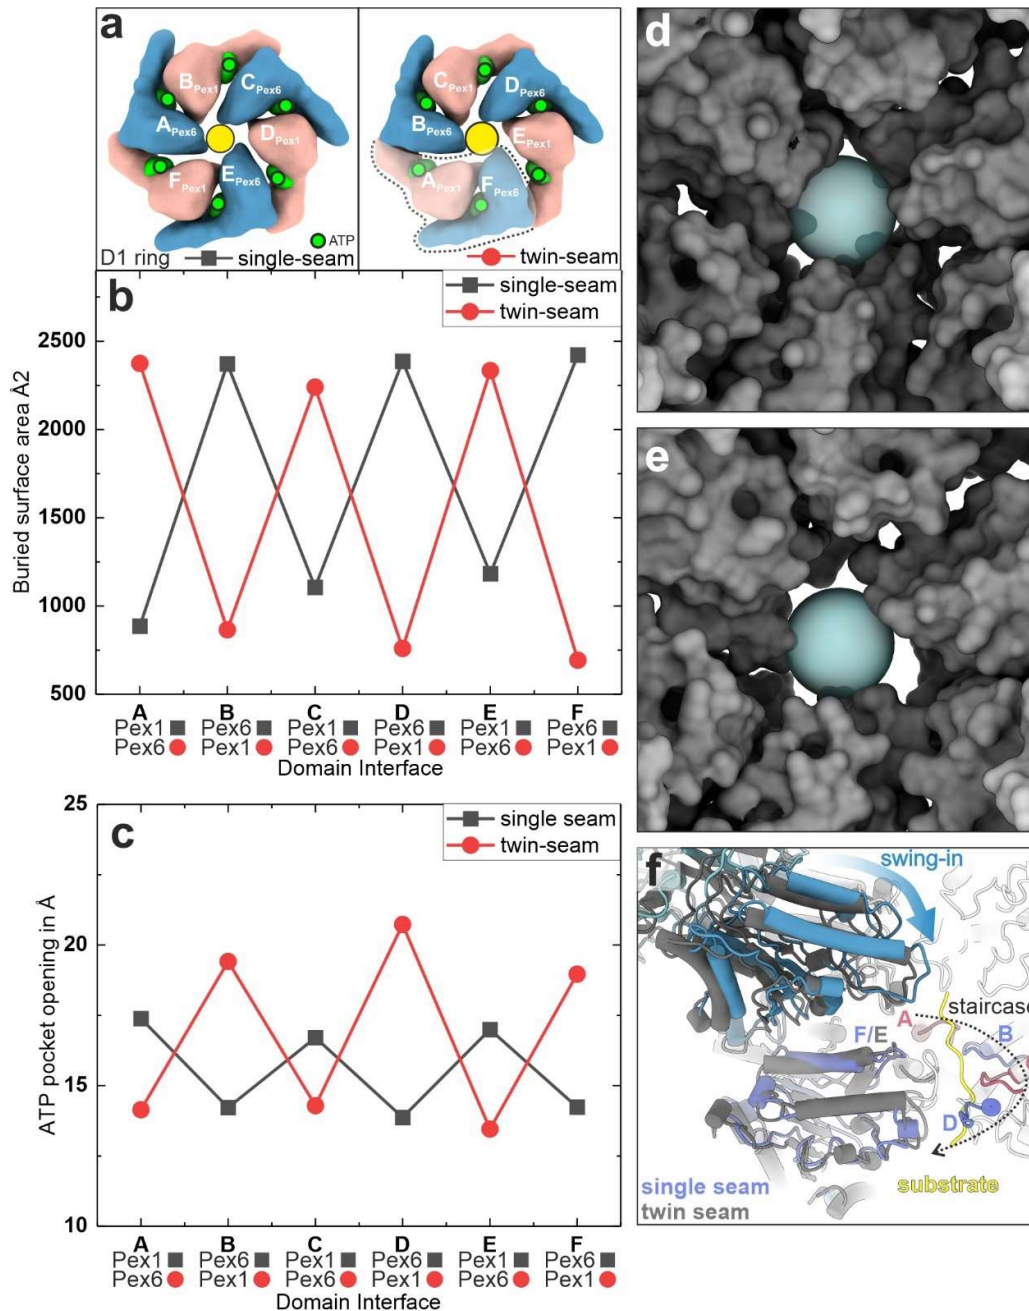

**Supplementary Figure 7: Structural dynamics of the D1 Ring between single- and twin-seam state.** **a)** Position of nucleotide binding pockets and D2-interfaces for the single-seam (left inset) and twin-seam state (right inset). **b-c)** Shown are measurements of the opening of the **b)** nucleotide binding pocket (Pex1 T468 to Pex6 D582 and Pex6 T491 to Pex1 K563) and the **c)** buried surface between adjacent subunits for the single- (gray) and twin-seam (red) state. The buried surface area was measured between the D2 domains of Pex1 (residues 201-680) and Pex6 (residues 201-722). **d-e)** D1 pore of **d)** single seam state and **e)** twin-seam state as surface representation. The blue transparent sphere has a diameter of 15 Å. Note the widening of the pore from single- to twin seam-state. **f)** Single-seam state (gray) superimposed on twin-seam state (colored) with chains D (except pore loop) removed to show the interior. Note that the twin-seam (left protomers, gray) swing in on the opposite side of the pore loops 1 staircase, during transition to single-seam (left protomer, colored).



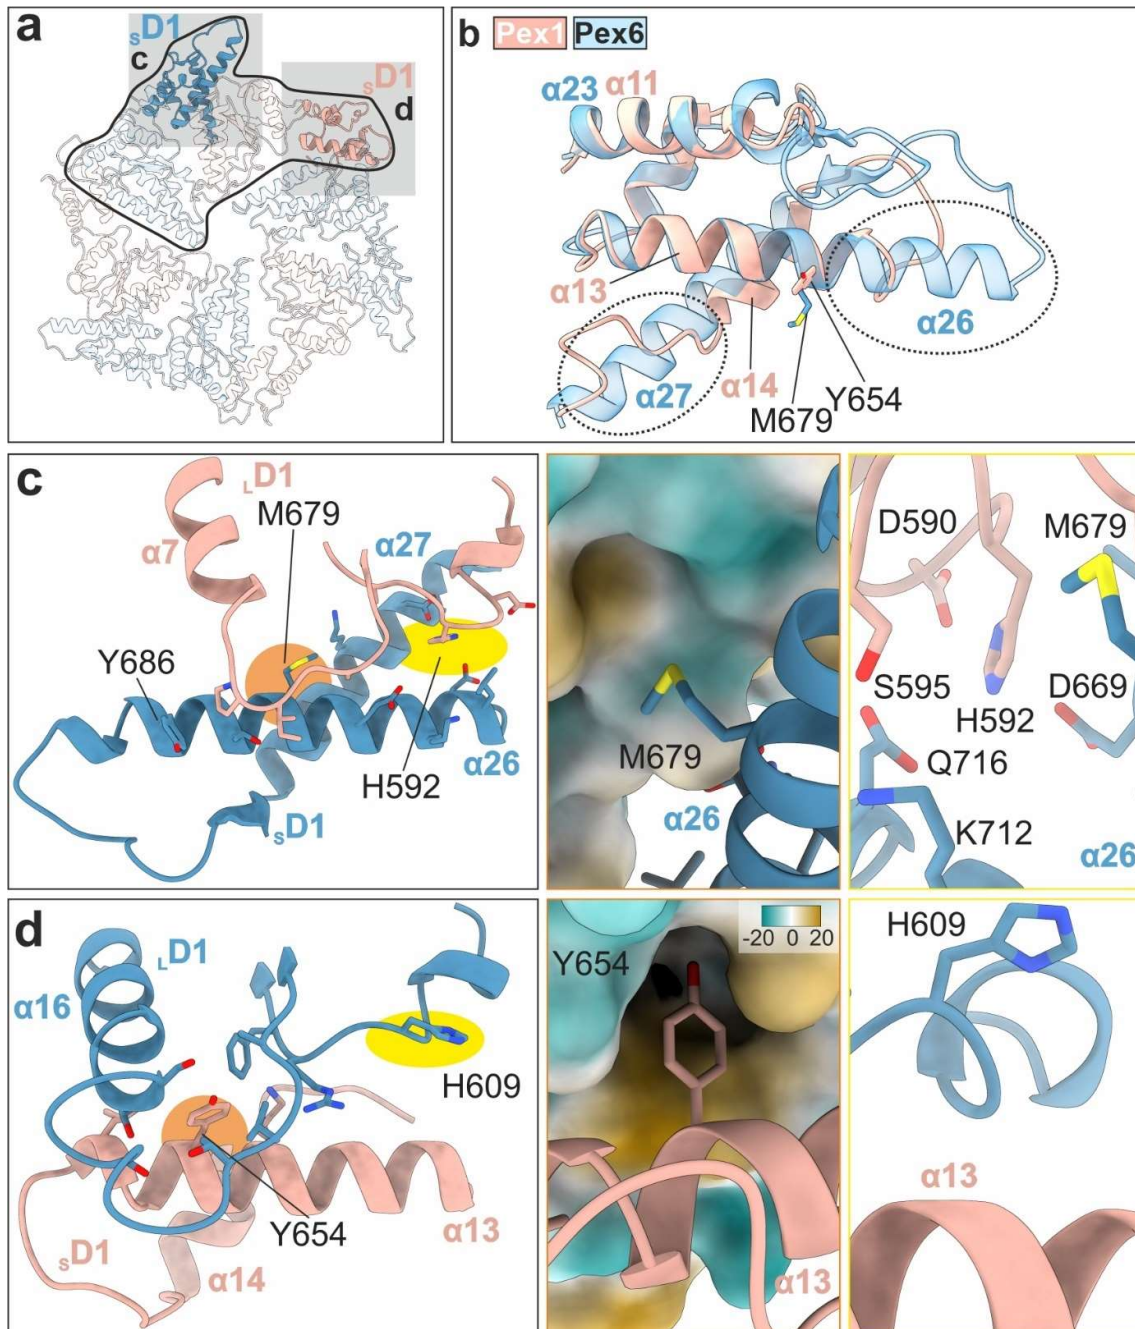

**Supplementary Figure 8: Distinct features of the small D1-ATPase domains of Pex1 and Pex6 determine the “trimer-of-dimers” arrangement in the D1 ring.** **a)** Top view of the Pex1/Pex6 D1 ring. The Pex6/Pex1 dimer indicated by a black line. The D1 small ATPase subdomains (sD1) of Pex1 (beige) and Pex6 (blue) are highlighted. **b)** Structural alignment of Pex1(sD1) (residues 605-685, beige) and Pex6(sD1) (residues 621-721, blue transparent). Note the deletion in helix  $\alpha 13$  and  $\alpha 14$  of Pex1(sD1). **c)** Contact site of Pex6(sD1) with Pex1(LD1) (compact Interface within the dimer). M679 of the prolonged  $\alpha 26$  helix of Pex6(sD1) (orange highlight) binds to a hydrophobic pocket formed by helix  $\alpha 7$ , and the loop upstream (residues 447-456) of Pex1(LD1). The middle panel shows a close-up view of this interface, with the surface of the pocket colored by hydrophobicity. The conserved histidine H592 of Pex1(LD1) (yellow highlight) binds into a negatively charged pocket formed by the prolonged helices  $\alpha 26$  and  $\alpha 27$  of Pex6(sD1). A close-up view of this interface is shown in the right panel.

**d)** Contact site of Pex1<sub>(sD1)</sub> with Pex6<sub>(LD1)</sub> (less compact interface between dimers). Due to the deletion in helix  $\alpha$ 13 of Pex1<sub>(sD1)</sub>, Y654 (orange highlight) binds to the hydrophobic pocket formed by helix  $\alpha$ 16 and the loop upstream (residues 464-478) of Pex6<sub>(LD1)</sub>. The middle panel shows a close-up view of this interface, with the surface of the pocket colored by hydrophobicity. Interestingly, due to the deletion, the analogous conserved H609 of Pex6<sub>(LD1)</sub> (yellow highlight, right panel) does not contact Pex1<sub>(sD1)</sub>.

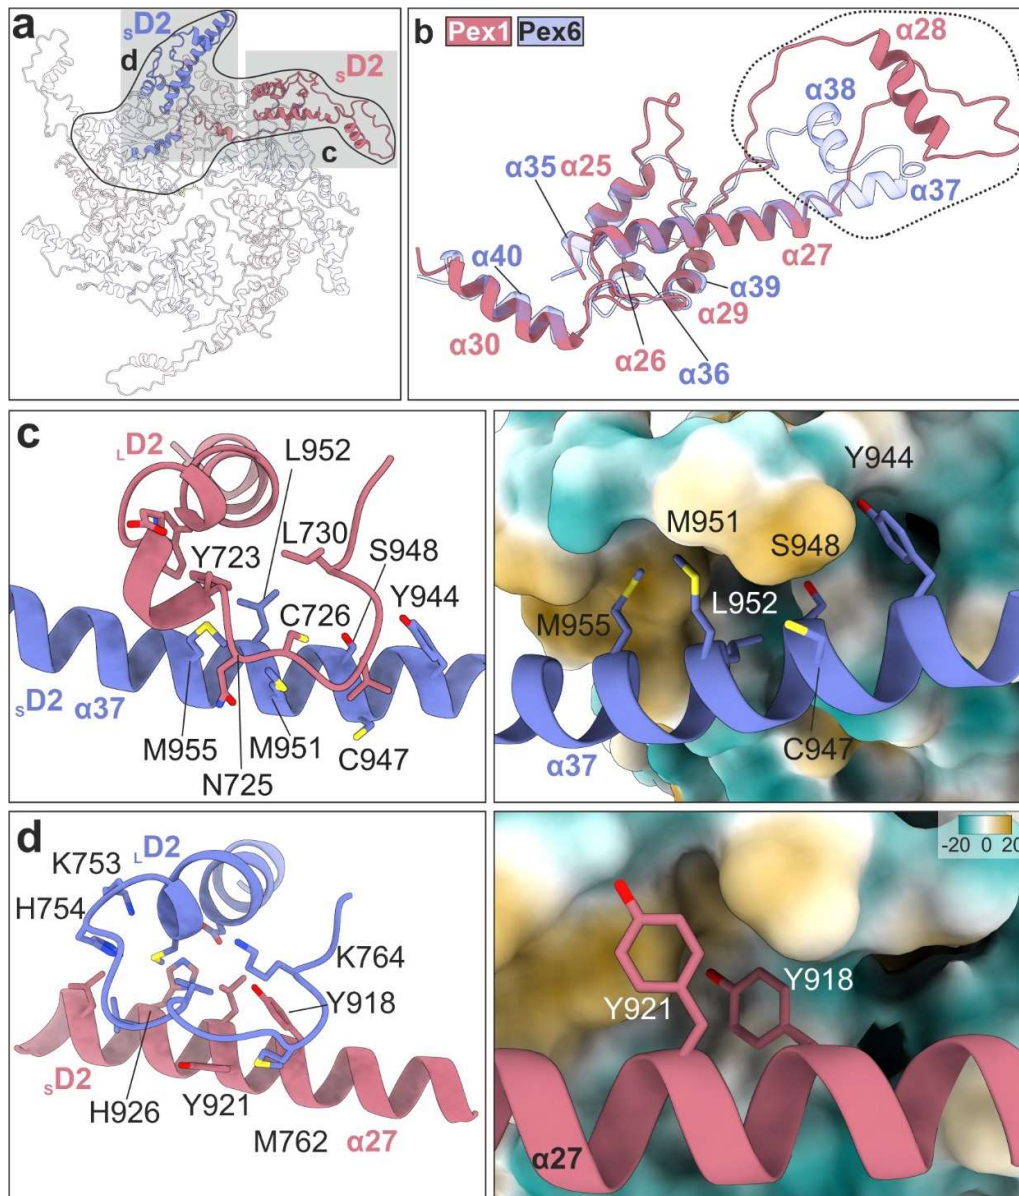

**Supplementary Figure 9: Distinct features of the small D2-ATPase domains fine-tune trimer-of-dimer arrangement in the D2-ring.** **a)** Top view of the Pex1/Pex6 D2 ring. The Pex6/Pex1 dimer is indicated by a black line. The D2 small ATPase subdomains ( $s$ D2) and large ATPase domains ( $L$ D2) of Pex1 (red) and Pex6 (blue) are highlighted. **b)** Structural alignment of Pex1( $s$ D2) (residues 868-1021, beige) and Pex6( $s$ D2) (residues 900-1030, blue transparent). Note the distinct Pex1( $\alpha 28$ ) and Pex6( $\alpha 38$ ) protrusion domains highlighted by the dashed line. **c)** Contact site of Pex6( $s$ D2) with Pex1( $L$ D2) (compact Interface within the dimer). Hydrophobic residues (M951, L952, M955 and Y944) mediate interactions within the dimer binding into a hydrophobic groove (right panel) formed by Pex1( $\alpha 18$ ) and the loop upstream. **d)** Contact site of Pex1( $s$ D2) with Pex6( $L$ D2) (loose interface between dimers). Two hydrophobic residues (Y918 and Y921) on Pex1( $\alpha 27$ ) mediate interactions between dimers via binding into a hydrophobic pocket (right panel) formed by Pex6( $\alpha 28$ ) and the loop upstream.



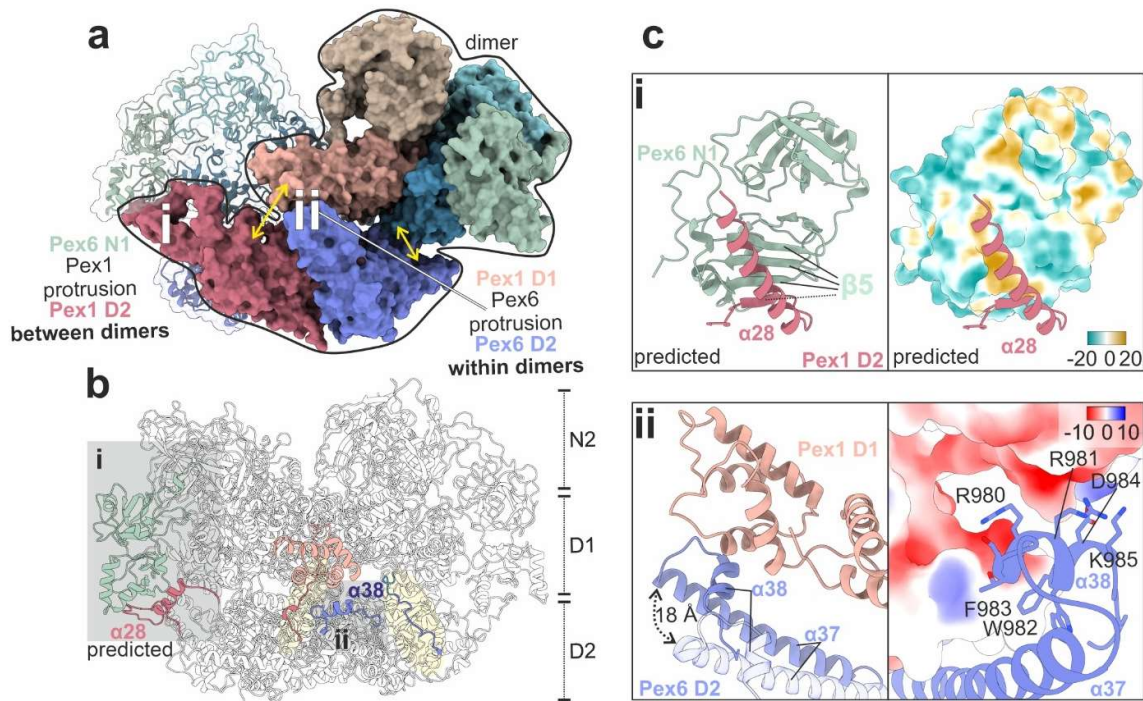

**Supplementary Figure 10: Interactions between the D1 and D2 ring.** **a**) Overview of the D1-D2 interactions via the protrusion domains of Pex1(i), Pex6(ii) and flexible linker peptides (yellow double-arrows). A Pex1/Pex6 subunit dimer is shown in surface representation. The clockwise (from top) adjacent Pex6 subunit is shown in ribbon representation. **b**) The structural elements involved in D1-D2 interactions are shown in ribbon representation and highlighted in color. In particular, the linker peptides (Pex1 (red, aa680-690); Pex6 (blue, residues 722-729)) covalently link the D1 and D2 ATPase cassettes. The protrusion domain of Pex1(D2) (amphipathic  $\alpha 28$  helix) is flanked by long flexible loops and establishes an interface between neighboring dimers via anchoring at the adjacent Pex6(N1) domain (green) (i). The protrusion domain of Pex6(D2) (helix  $\alpha 38$ ) mediates contact between the Pex6(D2) and the Pex1(<sub>s</sub>D1) domains within a subunit dimer (ii). **c**) Close-up view of interface (i) (upper-insets) and ii (lower insets). Please note: The Pex1(D2) protrusion domain ( $\alpha 28$ ) is not well resolved. To address this, the interface (i) (Pex1(D2) (residues 940-976, red) and Pex6(N1)(1-201, green) (left panel) was predicted using AlphaFold. Note that the Pex1  $\beta$ -strand upstream of  $\alpha 28$  enters the  $\beta$ -sheet 5 ( $\beta 5$ ) of Pex6. Together they form a hydrophobic groove, to which  $\alpha 28$  (red) docks (right panel). **ii** This intra-dimer interface is flexible and depends on the nucleotide binding state of Pex6(D2). The Pex6( $\alpha 38$ ) protrusion helix at the tip of Pex6( $\alpha 37$ ) undergoes large movements (indicated by a dashed arrow) during ATPase cycle (right panel). During the transition from twin- to single seam state,  $\alpha 38$  of the Pex6(D2) domain reengages and binds into a charged groove of Pex1(D1). Scalebar kcal/(mol·e) at 298 K.

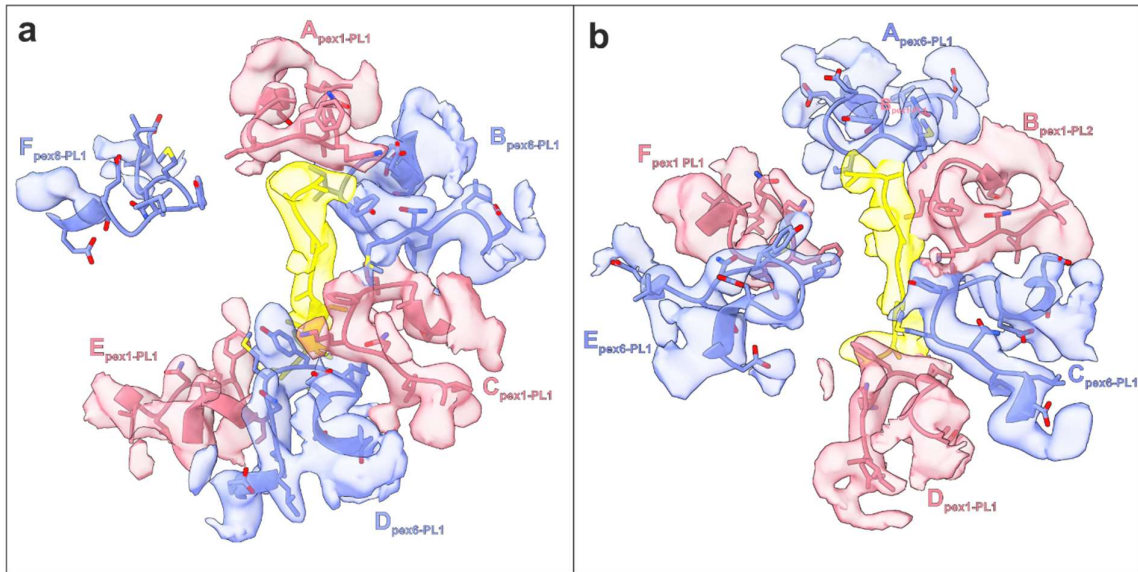

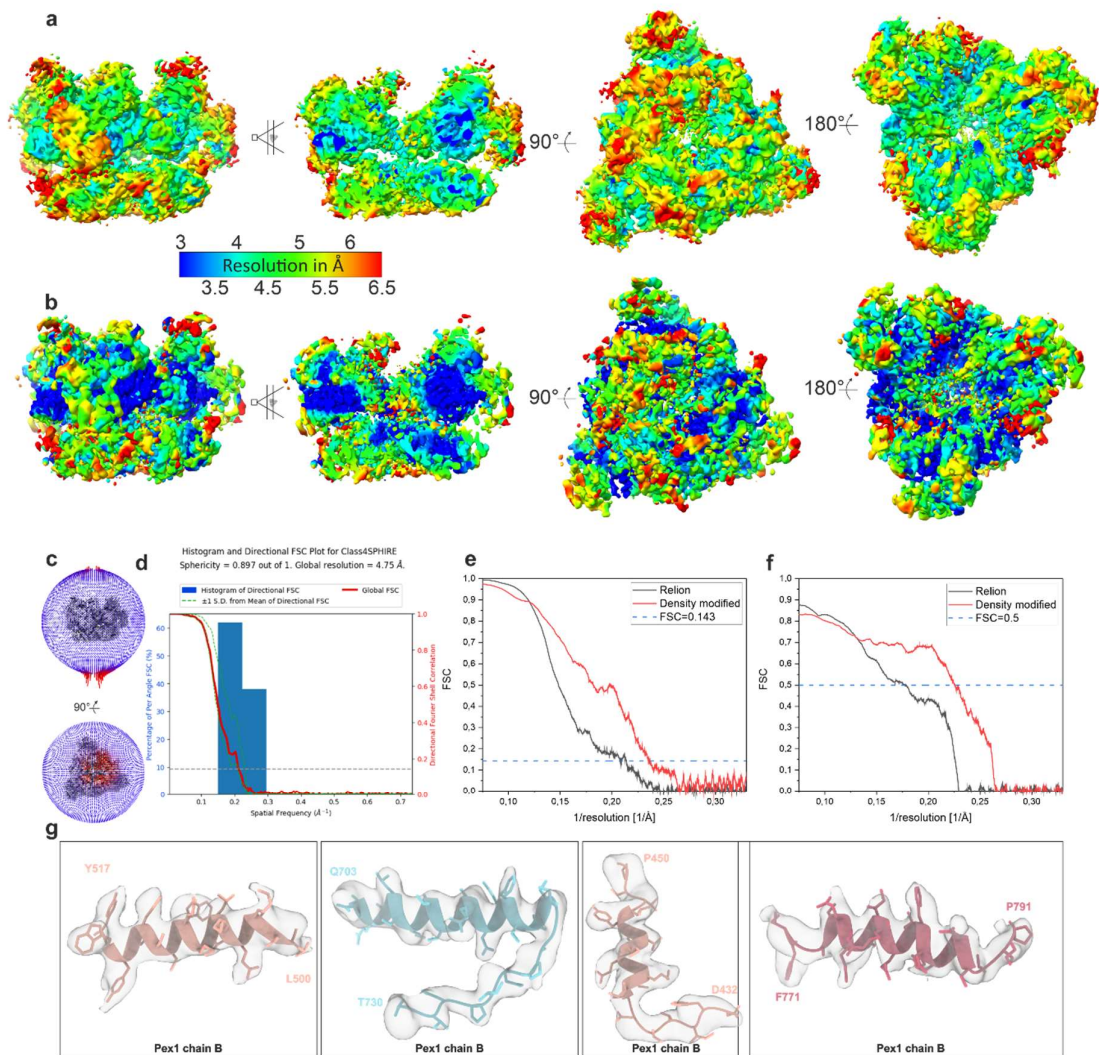

**Supplementary Figure 12: Cryo-EM structure of the single 'twin-seam' state (class 4).** **a-b)** Different surface views and cross-section of the cryo-EM density map colored according to the local resolution, upon post-processing in RELION at 4.42 sigma (a) and after local anisotropic half map sharpening and density modification using Phenix at 2.11 sigma (b). **c)** Angular distribution for the final round of the refinement. **d)** 3D FSC curve. **e)** Half-map FSC curves and **f)** model-map FSC curves before (gray) and after (red) density modification using phenix. **g)** Representative areas of the density map superimposed with the molecular model. Density-modified map is shown at 2.11 sigma.



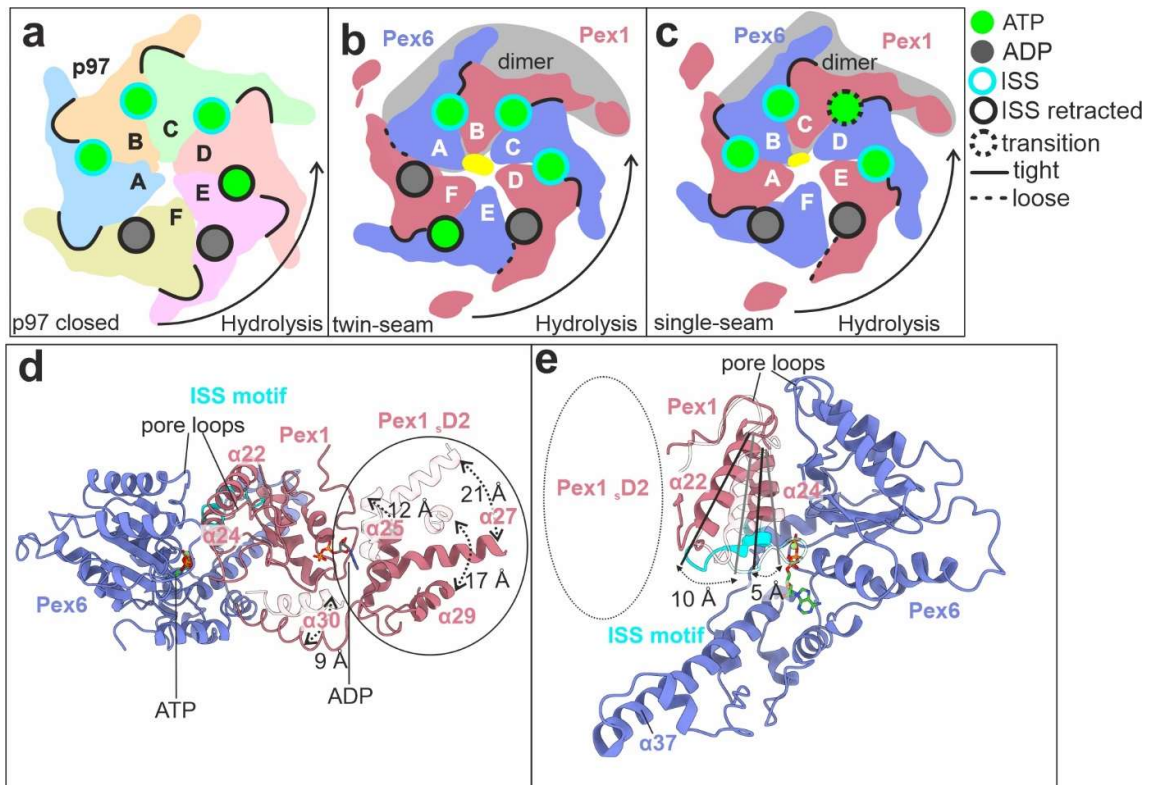

**Supplementary Figure 13: Inter-subunit signaling (ISS) motif controls ATP hydrolysis.**

**a)** Illustration showing the arrangement of the D2 ring in p97 (closed conformation PDB: 7LN5)<sup>2</sup>. Note that the ISS motif of subunit F (ADP) is retracted from the nucleotide site of the neighboring subunit E and primes this site for hydrolysis. **b-c)** Illustration showing the arrangement of the D2 ring in Pex1/Pex6 in “single-seam” (b) and “twin-seam” state (c). Note that the ISS at the tight dimeric interface (D/E) (“single-seam”, b) blocks hydrolysis. Upon release, the dimer (E/F) (“twin-seam”, c) is less compact, the ISS is retracted and the dimeric interface is primed for hydrolysis. **d)** Pex6/Pex1 “twin-seam dimer” (chain E/F, colored blue/red) superimposed with staircase engaged Pex6/Pex1 dimer from the single-seam state (chain D/E, chain D removed, chain E transparent red) aligned on the large ATPase subdomain of Pex6 to visualize conformational changes upon dimer-detachment from the staircase. Note large conformational changes of the Pex1<sub>(s)D2</sub> subdomain upon detachment from the staircase. **e)** Same as in (d) but viewed from top. Pex1<sub>(L)D2</sub> is removing the ISS motif from the nucleotide pocket to prime it for hydrolysis.

## Source data

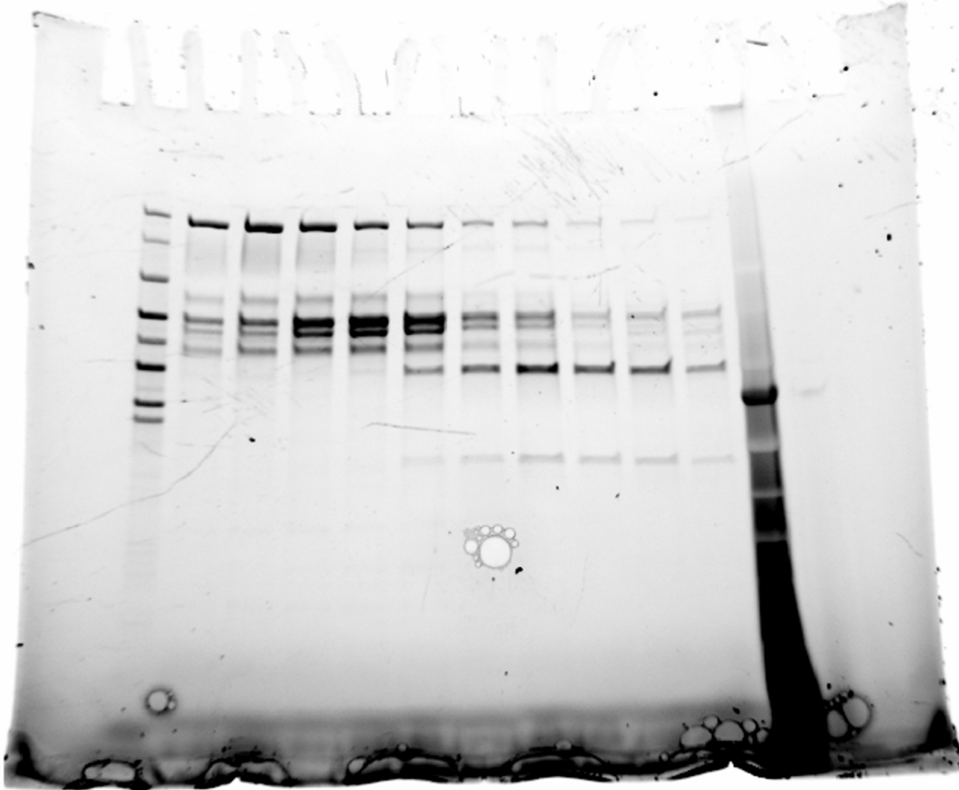

Source data 1: Uncropped gel corresponding to Supplementary Figure 2a.

## Supplementary References

1. Laskowski, R. A. PDBsum: summaries and analyses of PDB structures. *Nucleic acids research* **29**, 221–222; 10.1093/nar/29.1.221 (2001).
2. Pan, M. *et al.* Mechanistic insight into substrate processing and allosteric inhibition of human p97. *Nature structural & molecular biology* **28**, 614–625; 10.1038/s41594-021-00617-2 (2021).
